# Supplementary material for: A novel approach for facilitating the targeted synthesis of silicoaluminophosphates
Source: Royal Society of Chemistry journal article supplement (doi:10.1039/c8ta08134d), 2018-01-01
Supplement: c8ta08134d1.pdf [file c8ta08134d1.pdf]

# A Novel Approach for Facilitating the Targeted Synthesis of Silicoaluminophosphates

Nana Yan<sup>a,b</sup>, Lei Wang<sup>a</sup>, Xiaona Liu<sup>a,b</sup>, Pengfei Wu<sup>a,b</sup>, Tantan Sun<sup>a,b</sup>, Shutao Xu<sup>a</sup>, Jingfeng Han<sup>a</sup>, Peng Guo<sup>\*a</sup>, Peng Tian<sup>\*a</sup> and Zhongmin Liu<sup>\*a</sup>

1. Experimental section

Figures. S1 to S19

Tables. S1 to S8

References

---

<sup>a</sup>. National Engineering Laboratory for Methanol to Olefins, Dalian National Laboratory for Clean Energy, Dalian Institute of Chemical Physics, Chinese Academy of Sciences, Dalian 116023 (China).

<sup>b</sup>. University of Chinese Academy of Sciences, Beijing 100049 (China)

## **1. Experimental section**

### **1.1 DNL-6 seed**

Seed A: The typical DNL-6-DEA was synthesized based on the recipe in **Ref. 1** and then was calcined under 600 °C for 4h in air.<sup>1</sup> The calcined sample was milled to a very low crystallinity using a planetary ball mill, denoted Seed A.

Seed B: Seed with crystal size ca. 200 nm was synthesized based on the method described in **Ref. 2** (a gel composition of 1.5 OSDA: 0.2 SiO<sub>2</sub>: 0.4 P<sub>2</sub>O<sub>5</sub>: 0.5 Al<sub>2</sub>O<sub>3</sub>: 50 H<sub>2</sub>O 0.2 CTAB, with a large amount of Seed A).<sup>2</sup> And then the as-made sample was calcined to remove organic structure direct agent (OSDA), denoted as Seed B.

**If not emphasized, the seed used in this work was Seed B.**

### **1.2 Initial tentative synthesis of DNL-6 using fourteen types of organic amines**

Initial trials, verifying whether amines listed in Figure 2 have the ability to direct the synthesis of DNL-6, were based on the typical synthesis of DNL-6-DEA in **Ref. 1**.<sup>1</sup> The same gel composition of 1.0 OSDA: 0.2 SiO<sub>2</sub>: 0.4 P<sub>2</sub>O<sub>5</sub>: 0.5 Al<sub>2</sub>O<sub>3</sub>: 50 H<sub>2</sub>O 0.15 CTAB with a small amount of seeds (2-5wt%, based on Al<sub>2</sub>O<sub>3</sub>) was employed.

All trials were carried out by the conventional hydrothermal method. Phosphoric acid, amine, and deionized water were mixed and then vigorously stirred. And then tetraethyl orthosilicate (TEOS) and aluminum isopropoxide were added sequentially. After stirring overnight, hexadecyl trimethyl ammonium bromide (CTAB) and a certain amount of seeds were added into the homogeneous gel. Then thorough mixing gel was transported into a 35ml Teflon-lined autoclave and crystallized at 200°C for 24h under the rotation state of 75 r/min. The final products were recovered by centrifugation, washed with distilled water repeatedly, and dried at 120°C overnight.

### **1.3 Nine Optimized recipes of DNL-6s for the following structural analysis**

The optimized synthesis process of the fourteen amines was similar to initial tentative synthesis.

For the nine amines which can synthesize well-crystallized DNL-6s, the detail synthetic information regarding raw materials and crystallization time was listed in Table S2.

It is challenging to synthesize pure DNL-6 samples using MIPA, TBEA, EBnA, BA, and PeA as OSDAs. And the best synthesis conditions and PXRD results were shown in Table S4, S5 and Figure S6.

### **1.4 Initial tentative synthesis of DNL-6s using triethylamine, tetraethylammonium hydroxide, and dimethylamine as OSDA**

The gel composition for the tentative synthesis employing triethylamine, tetraethylammonium hydroxide, and dimethylamine as OSDAs is 1.0 OSDA: 0.2 SiO<sub>2</sub>: 0.4 P<sub>2</sub>O<sub>5</sub>: 0.5 Al<sub>2</sub>O<sub>3</sub>: 50 H<sub>2</sub>O 0.15 CTAB (the largest amount of seeds (40%, based on Al<sub>2</sub>O<sub>3</sub>) used). The preliminary PXRD results are shown in Figure S18.

### **1.5 Tentative synthesis for SAPO-42**

The tentative synthesis of SAPO-42 was same to DNL-6. Represent synthesis recipes were listed in Table S6 and S7.

Seed C: The as-made sample SAPO-42-DPA-1 was calcined under 600 °C for 4h in air. denoted Seed C.

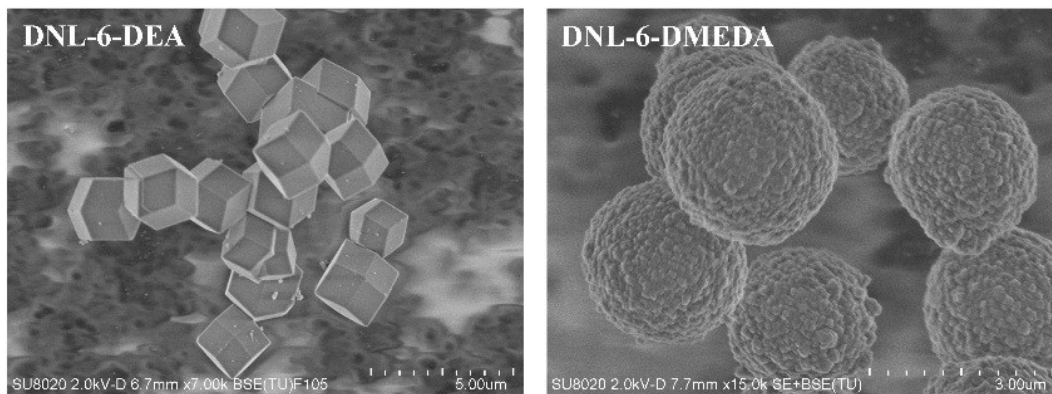

**Figure S1.** SEM images of DNL-6-DEA and DNL-6-DMEDA.

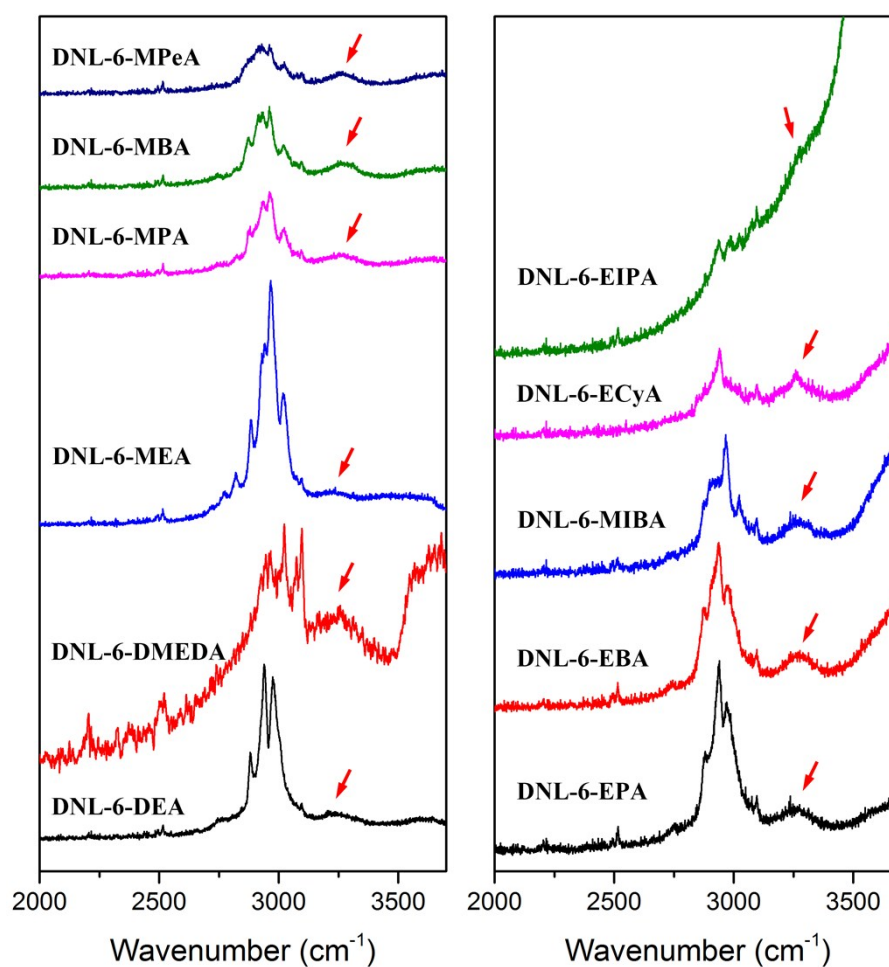

**Figure S2.** Raman spectra of DNL-6s.

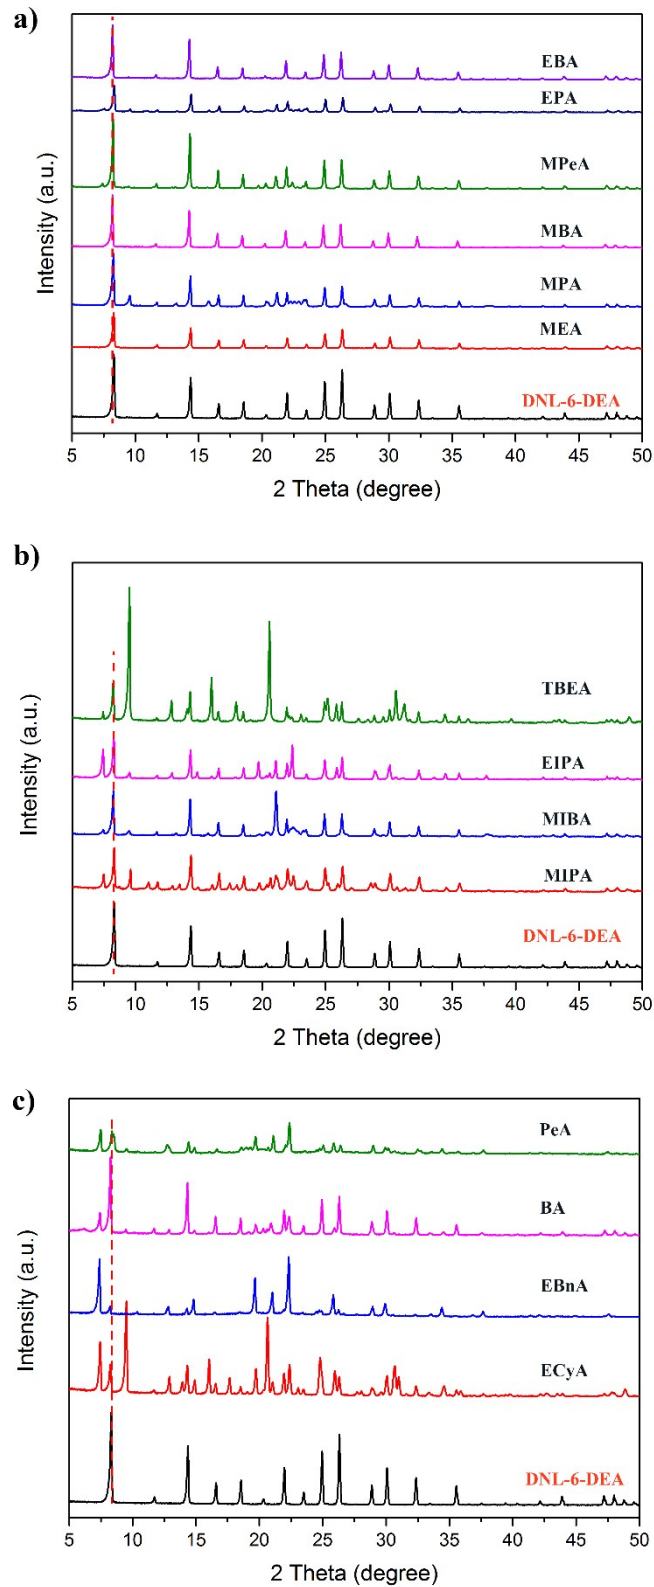

**Figure S3.** The PXR D results of the fourteen initial tentative synthesis with a gel composition 1.0 OSDA: 0.2 SiO<sub>2</sub>: 0.4 P<sub>2</sub>O<sub>5</sub>: 0.5 Al<sub>2</sub>O<sub>3</sub>: 50 H<sub>2</sub>O 0.15 CTAB. A small amount of seeds was added. For clarity, the OSDAs used were labeled as the abbreviation corresponding to Figure 2 in the main text.

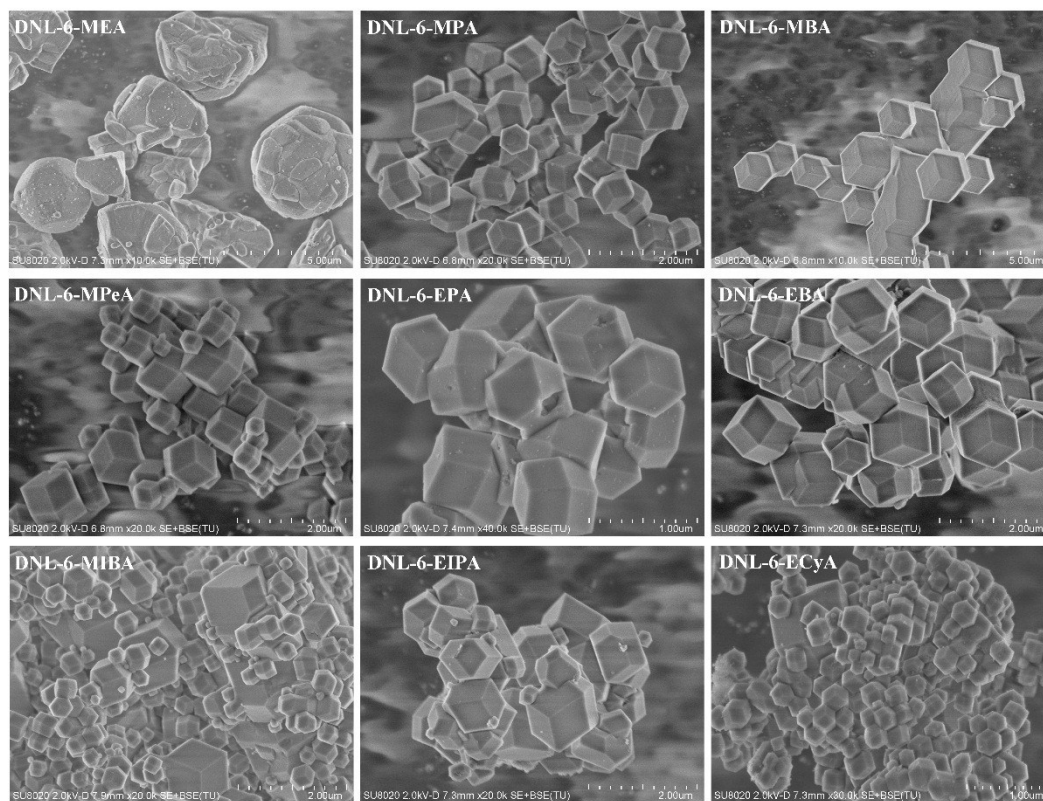

**Figure S4.** SEM images of DNL-6s synthesized by nine types of OSDAs listed in Table 1.

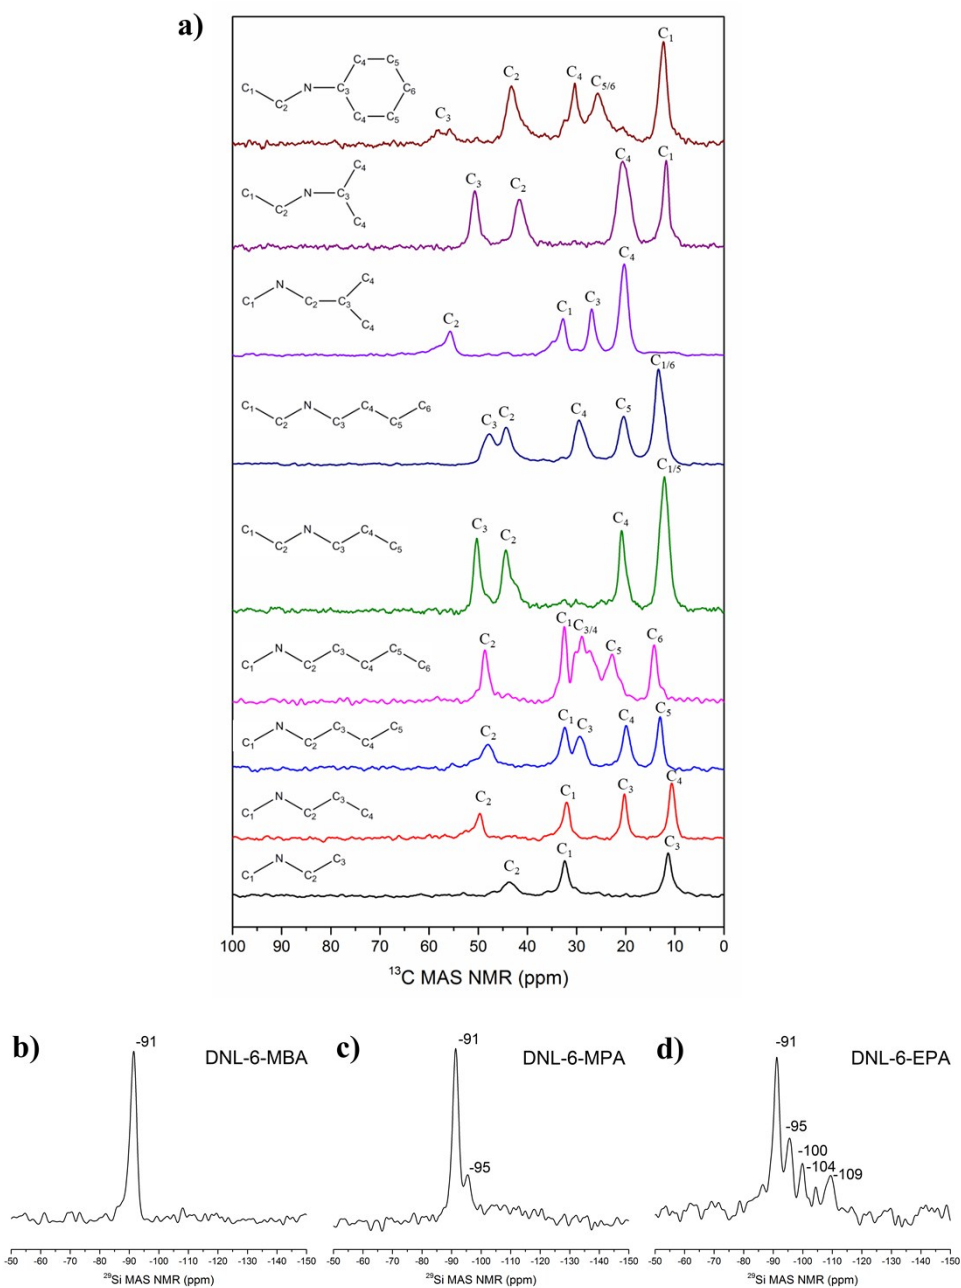

**Figure S5.** a)  $^{13}\text{C}$  MAS NMR of DNL-6s synthesized by nine types of OSDAs listed in Table 1. b), c), and d)  $^{29}\text{Si}$  MAS NMR of DNL-6-MBA, DNL-6-MPA and DNL-6-EPA, respectively.

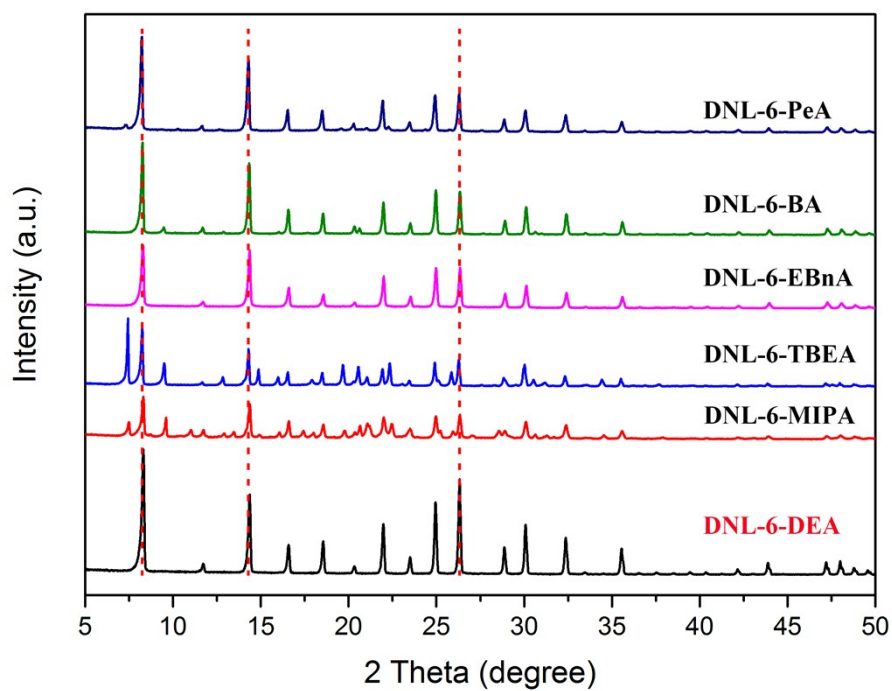

**Figure S6.** The PXRD results of five samples utilizing MIPA, TBEA, EBnA, BA, and PeA as OSDAs for DNL-6. Pure phase DNL-6 cannot be obtained, but with amorphous, SAPO-34 or/and SAPO-42.



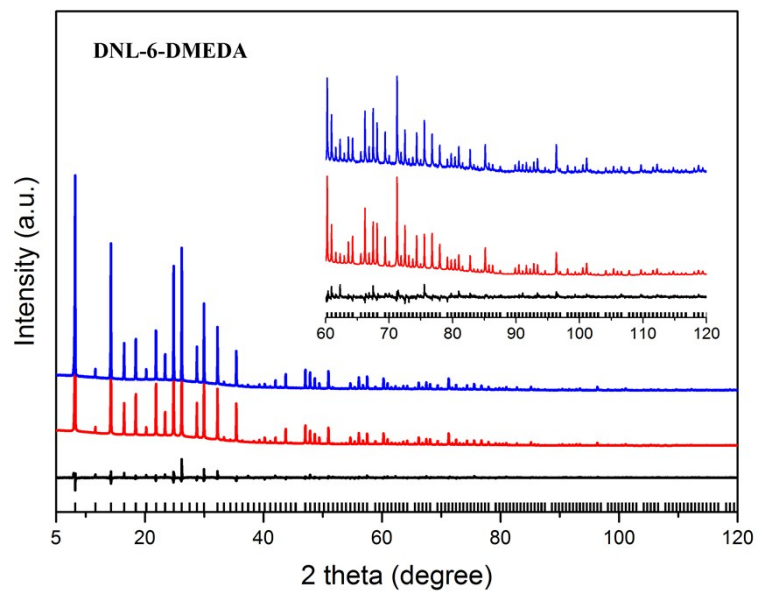

**Figure S7.** Final Rietveld refinement plots of DNL-6-DMEDA. The observed, calculated, and difference curves are in blue, red, and black, respectively. The vertical bars indicate the positions of Bragg peaks (Cu  $K\alpha_1$ ,  $\lambda = 1.5406 \text{ \AA}$ ). The inset is the high angle part of the profiles. The PXRD data was collected in the 0.3 mm capillary.

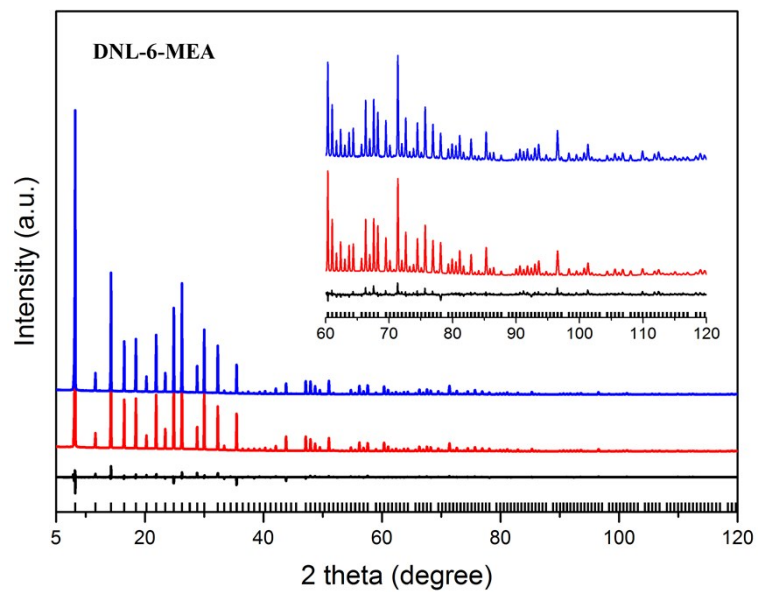

**Figure S8.** Final Rietveld refinement plots of DNL-6-MEA. The observed, calculated, and difference curves are in blue, red, and black, respectively. The vertical bars indicate the positions of Bragg peaks (Cu  $K\alpha_1$ ,  $\lambda = 1.5406 \text{ \AA}$ ). The inset is the high angle part of the profiles. The PXRD data was collected in the 0.3 mm capillary.

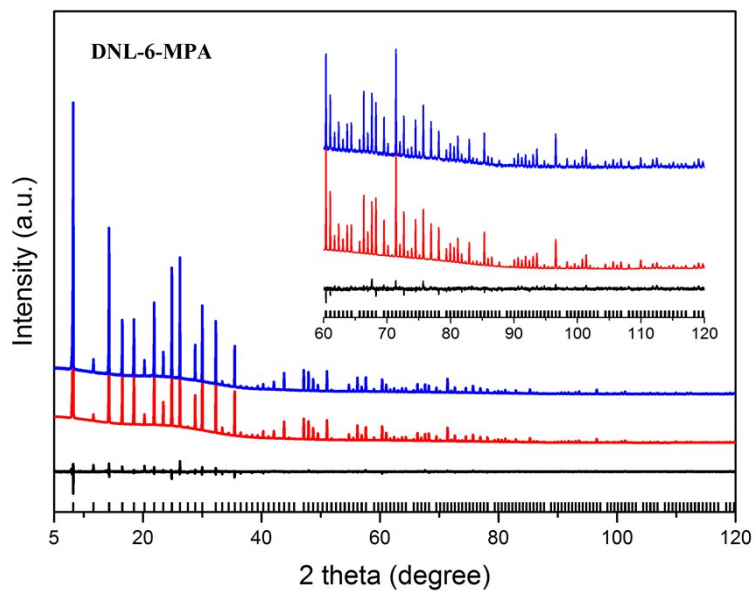

**Figure S9.** Final Rietveld refinement plots of DNL-6-MPA. The observed, calculated, and difference curves are in blue, red, and black, respectively. The vertical bars indicate the positions of Bragg peaks (Cu  $K\alpha_1$ ,  $\lambda = 1.5406 \text{ \AA}$ ). The inset is the high angle part of the profiles. The PXRD data was collected in the 0.2 mm capillary.

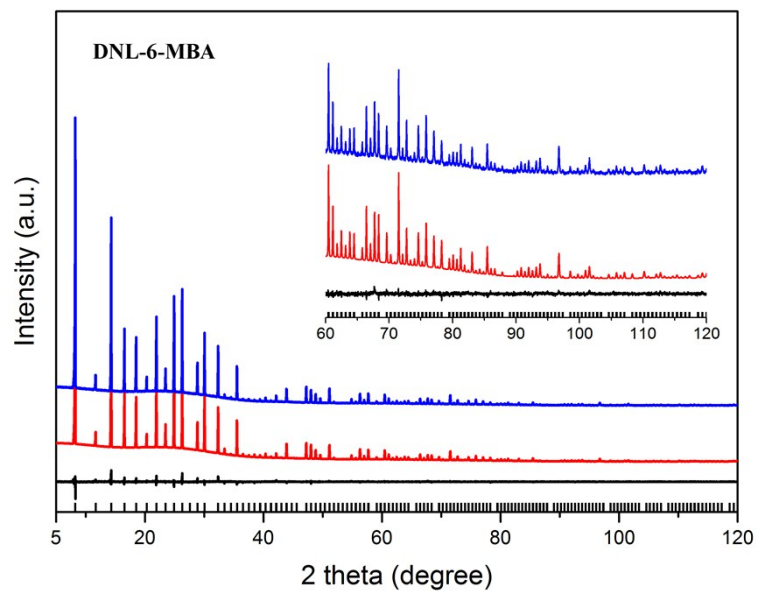

**Figure S10.** Final Rietveld refinement plots of DNL-6-MBA. The observed, calculated, and difference curves are in blue, red, and black, respectively. The vertical bars indicate the positions of Bragg peaks (Cu  $K\alpha_1$ ,  $\lambda = 1.5406 \text{ \AA}$ ). The inset is the high angle part of the profiles. The PXRD data was collected in the 0.2 mm capillary.

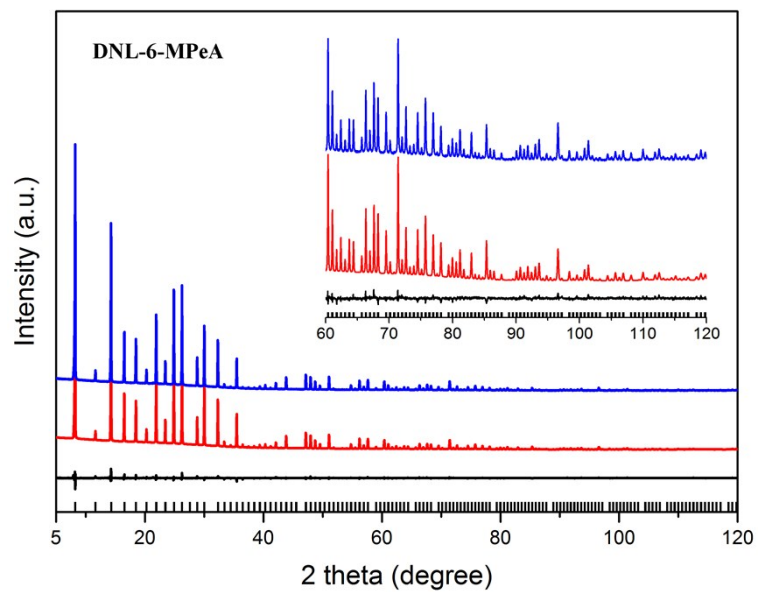

**Figure S11.** Final Rietveld refinement plots of DNL-6-MPeA. The observed, calculated, and difference curves are in blue, red, and black, respectively. The vertical bars indicate the positions of Bragg peaks (Cu  $K\alpha_1$ ,  $\lambda = 1.5406 \text{ \AA}$ ). The inset is the high angle part of the profiles. The PXRD data was collected in the 0.3 mm capillary.

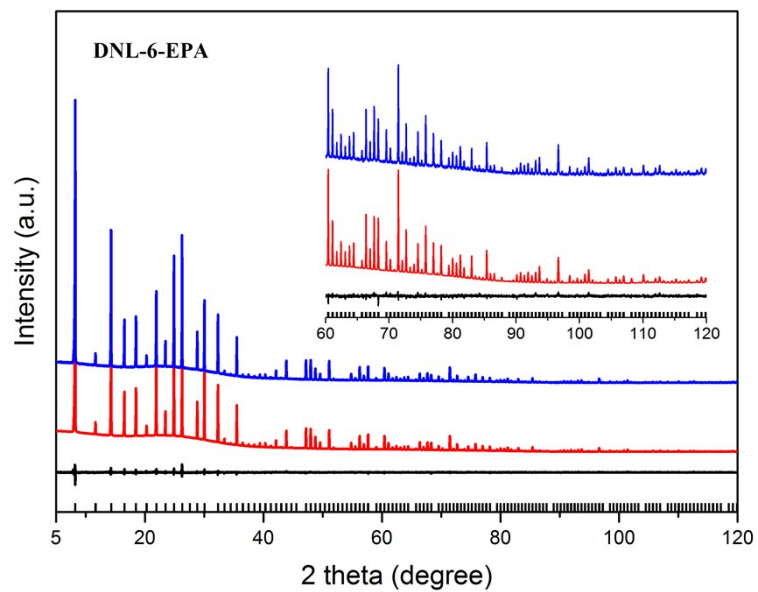

**Figure S12.** Final Rietveld refinement plots of DNL-6-EPA. The observed, calculated, and difference curves are in blue, red, and black, respectively. The vertical bars indicate the positions of Bragg peaks (Cu  $K\alpha_1$ ,  $\lambda = 1.5406 \text{ \AA}$ ). The inset is the high angle part of the profiles. The PXRD data was collected in the 0.2 mm capillary.

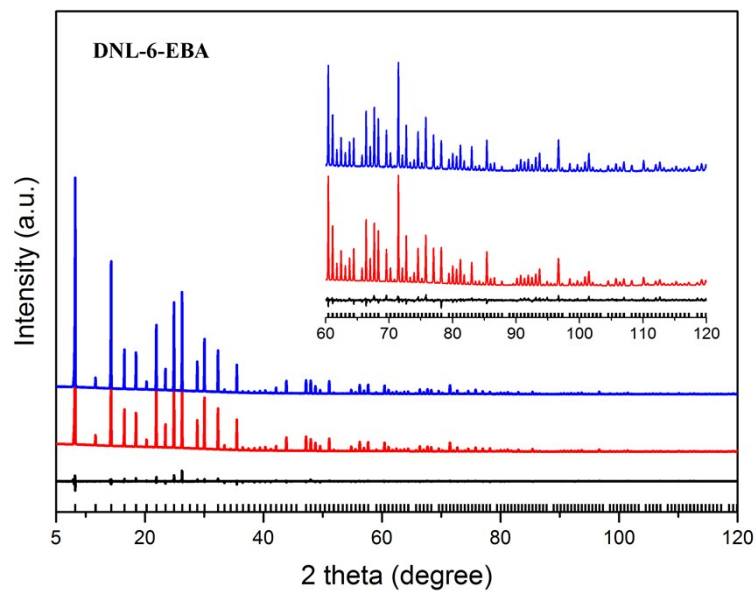

**Figure S13.** Final Rietveld refinement plots of DNL-6-EBA. The observed, calculated, and difference curves are in blue, red, and black, respectively. The vertical bars indicate the positions of Bragg peaks (Cu  $K\alpha_1$ ,  $\lambda = 1.5406 \text{ \AA}$ ). The inset is the high angle part of the profiles. The PXRD data was collected in the 0.3 mm capillary.

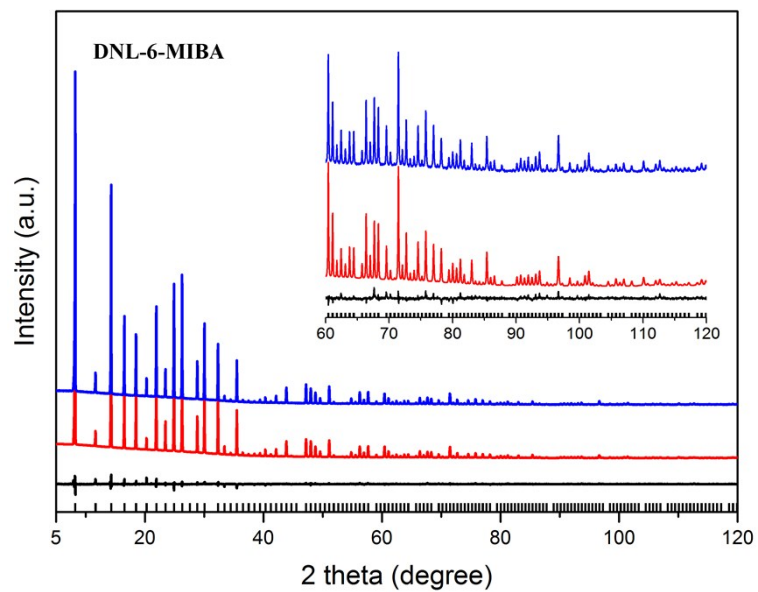

**Figure S14.** Final Rietveld refinement plots of DNL-6-MIBA. The observed, calculated, and difference curves are in blue, red, and black, respectively. The vertical bars indicate the positions of Bragg peaks (Cu  $K\alpha_1$ ,  $\lambda = 1.5406 \text{ \AA}$ ). The inset is the high angle part of the profiles. The PXRD data was collected in the 0.3 mm capillary.



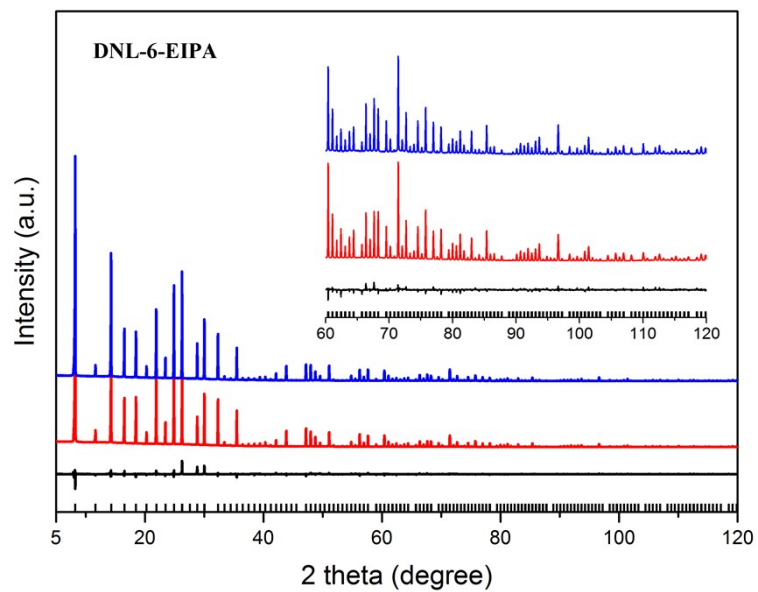

**Figure S15.** Final Rietveld refinement plots of DNL-6-EIPA. The observed, calculated, and difference curves are in blue, red, and black, respectively. The vertical bars indicate the positions of Bragg peaks (Cu  $K\alpha_1$ ,  $\lambda = 1.5406 \text{ \AA}$ ). The inset is the high angle part of the profiles. The PXRD data was collected in the 0.3 mm capillary.

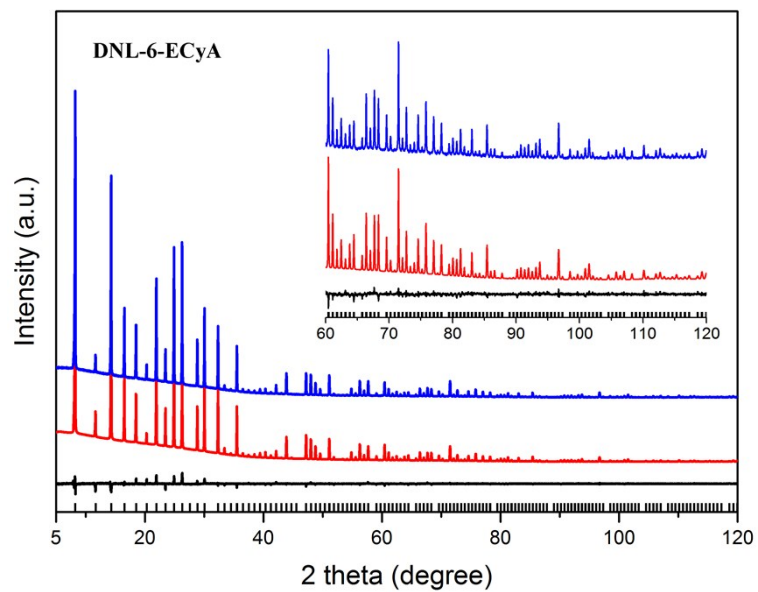

**Figure S16.** Final Rietveld refinement plots of DNL-6-ECyA. The observed, calculated, and difference curves are in blue, red, and black, respectively. The vertical bars indicate the positions of Bragg peaks (Cu K $\alpha$ 1,  $\lambda = 1.5406 \text{ \AA}$ ). The inset is the high angle part of the profiles. The PXRD data was collected in the 0.3 mm capillary.

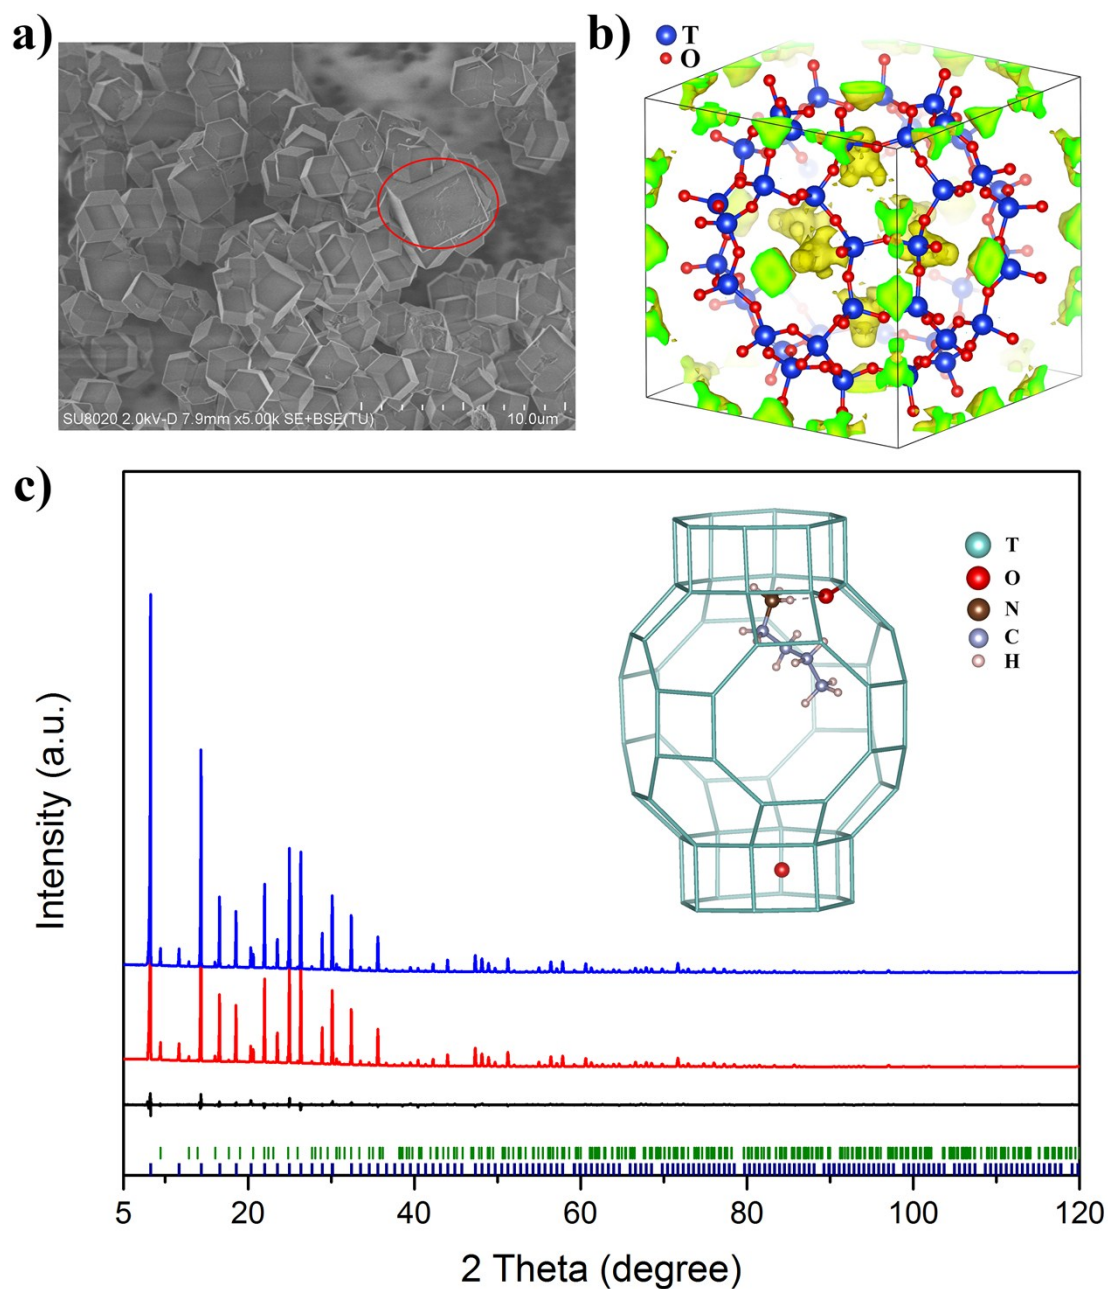

**Figure S17.** (a) The SEM image of sample DNL-6-BA and the impurity SAPO-34-BA highlighted in red circle. (b) The difference electron density map indicates the initial locations of BA and H<sub>2</sub>O. (c) Final Rietveld refinement plots of DNL-6-BA. The observed, calculated, and difference curves are in blue, red, and black, respectively. The navy vertical bars indicate the positions of Bragg peaks (Cu K $\alpha$ 1,  $\lambda = 1.5406 \text{ \AA}$ ) for DNL-6, while the olive one is SAPO-34. The insert is the locations of BA and H<sub>2</sub>O and the host-guest interaction in DNL-6-BA. The unit cell composition of DNL-6 phase in DNL-6-BA sample is  $[\text{BA}_{8,0}(\text{H}^+)_{8,3}(\text{H}_2\text{O})_{5,7}][\text{Al}_{23,7}\text{Si}_{8,9}\text{P}_{15,4}\text{O}_{96}]$ . The ratio of Si, Al and P was determined by EDS, and the contents of BA and H<sub>2</sub>O were refined value.

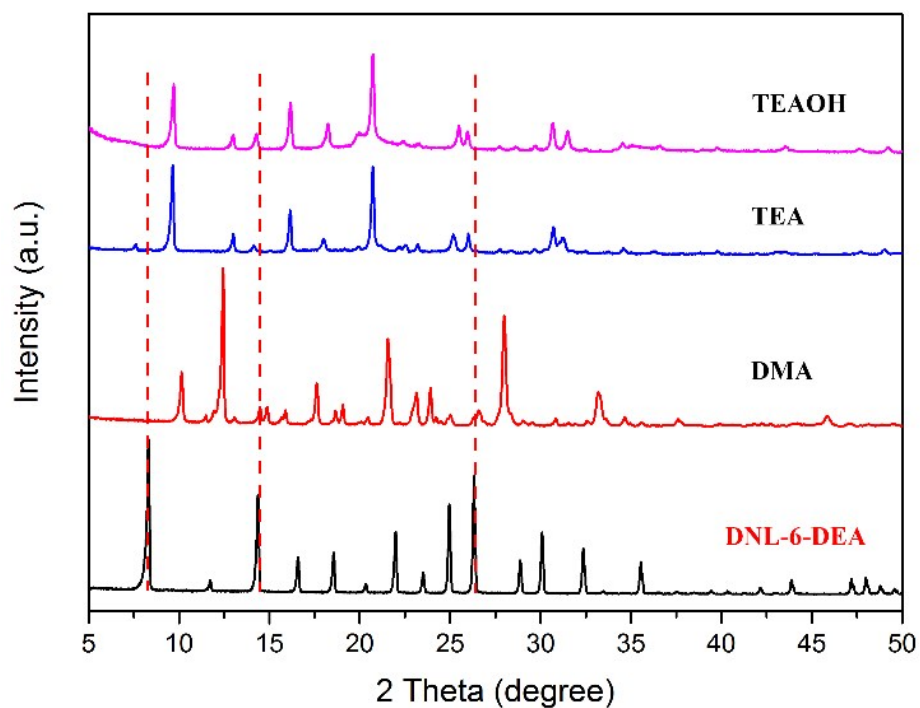

**Figure S18.** The PXRD results of the tentative synthesis using dimethylamine (DMA), triethylamine (TEA), tetraethylammonium hydroxide (TEAOH) as OSDAs with a gel composition 1.0 OSDA: 0.2 SiO<sub>2</sub>: 0.4 P<sub>2</sub>O<sub>5</sub>: 0.5 Al<sub>2</sub>O<sub>3</sub>: 50 H<sub>2</sub>O: 0.15 CTAB and 40% seed addition (based on Al<sub>2</sub>O<sub>3</sub>).

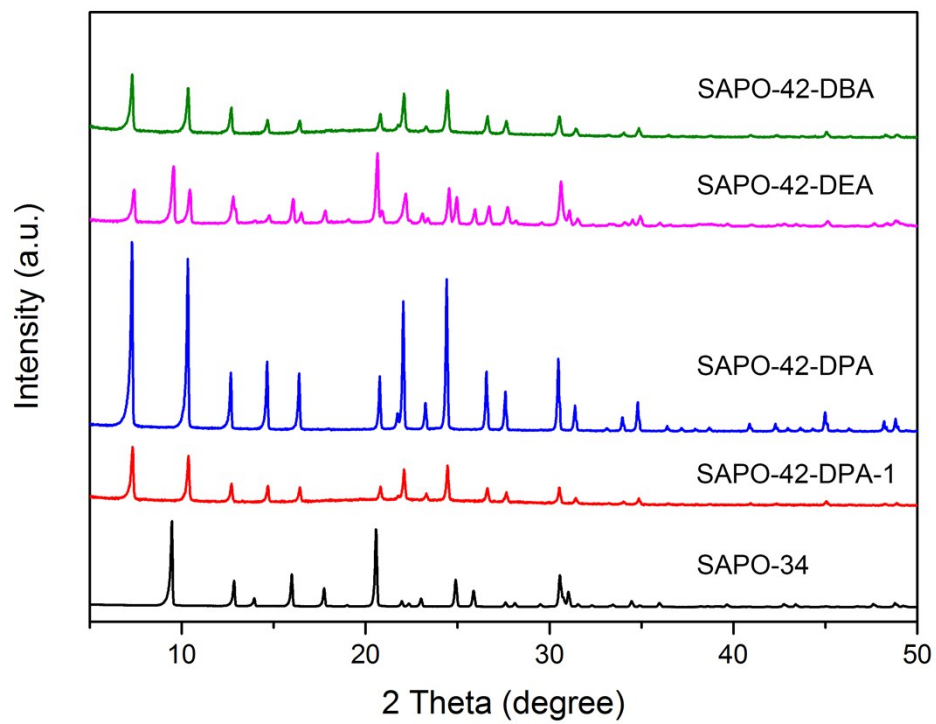

**Figure S19.** The PXRD results of sample in Table S6.

**Table S1.** Crystallographic details of Rietveld refinements of DNL-6 samples

| Sample             | DNL-6-DEA    | DNL-6-DMEDA  | DNL-6-MEA    | DNL-6-MPA    | DNL-6-MBA    | DNL-6-MPeA   |
|--------------------|--------------|--------------|--------------|--------------|--------------|--------------|
| Space group        | <i>I</i> 432 |
| a(Å)               | 15.16970(10) | 15.1935(2)   | 15.1700(2)   | 15.16710(10) | 15.14540(10) | 15.16300(10) |
| V(Å <sup>3</sup> ) | 3490.85(4)   | 3507.30(8)   | 3491.06(8)   | 3489.05(4)   | 3474.10(4)   | 3486.23(4)   |
| R <sub>p</sub>     | 0.0165       | 0.0280       | 0.0397       | 0.0173       | 0.0176       | 0.0212       |
| R <sub>wp</sub>    | 0.0240       | 0.0424       | 0.0591       | 0.0262       | 0.0250       | 0.0308       |
| R <sub>exp</sub>   | 0.0161       | 0.0159       | 0.0141       | 0.0156       | 0.0171       | 0.0148       |
| R <sub>bragg</sub> | 0.0110       | 0.0227       | 0.0445       | 0.0208       | 0.0174       | 0.0166       |
| GOF                | 1.489        | 2.667        | 4.172        | 1.686        | 1.460        | 2.078        |
| Reflections        | 299          | 302          | 299          | 299          | 299          | 299          |
| Parameters         | 58           | 61           | 58           | 52           | 57           | 55           |
| Restraints         | 4            | 5            | 4            | 4            | 4            | 4            |
| Hydrogen bonding   | 3.265(17)    | 2.51(5)      | 2.94(4)      | 2.95(2)      | 3.04(4)      | 2.823(17)    |
| CCDC number        | 1846955      | 1846956      | 1847057      | 1847060      | 1847056      | 1847059      |

**Table S1.** Crystallographic details of Rietveld refinements of DNL-6 samples (continued)

| Sample             | DNL-6-EPA    | DNL-6-EBA    | DNL-6-EIPA   | DNL-6-ECyA   | DNL-6-MIBA   | DNL-6-BA     |
|--------------------|--------------|--------------|--------------|--------------|--------------|--------------|
| Space group        | <i>I</i> 432 |
| a(Å)               | 15.15680(10) | 15.15430(10) | 15.15880(10) | 15.15030(10) | 15.15450(10) | 15.1119(2)   |
| V(Å <sup>3</sup> ) | 3481.95(4)   | 3480.23(4)   | 3483.33(4)   | 3477.47(4)   | 3480.37(4)   | 3451.10(8)   |
| R <sub>p</sub>     | 0.0154       | 0.0281       | 0.0409       | 0.0207       | 0.0245       | 0.0343       |
| R <sub>wp</sub>    | 0.0584       | 0.0445       | 0.0584       | 0.0307       | 0.0370       | 0.0510       |
| R <sub>exp</sub>   | 0.0157       | 0.0146       | 0.0142       | 0.0153       | 0.0150       | 0.0145       |
| R <sub>bragg</sub> | 0.0211       | 0.0348       | 0.0506       | 0.0321       | 0.0206       | 0.0274       |
| GOF                | 1.347        | 3.0377       | 4.119        | 2.005        | 2.468        | 3.515        |
| Reflections        | 299          | 299          | 299          | 299          | 299          | 295          |
| Parameters         | 59           | 58           | 54           | 53           | 57           | 84           |
| Restraints         | 4            | 4            | 4            | 4            | 4            | 10           |
| Hydrogen bonding   | 3.228(16)    | 2.735(17)    | 3.271(10)    | 3.270(14)    | 3.018(15)    | 2.94(2)      |
| CCDC number        | 1847055      | 1847061      | 1847054      | 1847068      | 1847058      | 1846953      |

**Table S2.** Complementary synthetic information of nine recipes of DNL-6s described in Table 1

| Sample     | Raw materials               |                              | Crystallization time<br>(h) |
|------------|-----------------------------|------------------------------|-----------------------------|
|            | Silicon source <sup>a</sup> | Aluminum source <sup>b</sup> |                             |
| DNL-6-MEA  | TEOS                        | AiP                          | 30                          |
| DNL-6-MPA  | FS                          | PB                           | 19.5                        |
| DNL-6-MBA  | FS                          | AiP                          | 14                          |
| DNL-6-MPeA | TEOS                        | AiP                          | 22                          |
| DNL-6-EPA  | FS                          | PB                           | 41                          |
| DNL-6-EBA  | TEOS                        | AiP                          | 25                          |
| DNL-6-MIBA | FS                          | AiP                          | 24                          |
| DNL-6-EIPA | CS                          | PB                           | 72                          |
| DNL-6-ECyA | TEOS                        | AiP                          | 44                          |

Notes: a: FS, fumed silica; TEOS, tetraethylorthosilicate; CS, colloidal silica (30%).

b: PB, pseudo-boehmite; AiP, aluminum isopropoxide.



**Table S3.** The representative synthetic conditions and results with nine highlighted-in-green amines listed in Figure 2

| OSDA                   | Sample | Gel composition<br>OSDA: SiO <sub>2</sub> : P <sub>2</sub> O <sub>5</sub> : Al <sub>2</sub> O <sub>3</sub> : H <sub>2</sub> O: CTAB (seed#) | Result*                   |
|------------------------|--------|---------------------------------------------------------------------------------------------------------------------------------------------|---------------------------|
|                        | MEA-1  | 2:0.3:0.4:0.5:50:0.15 (0)                                                                                                                   | DNL-6                     |
| N-Methylethylamine     | MEA-2  | 2:0.3:0.4:0.5:50:0 (20%)                                                                                                                    | DNL-6, unknown phase      |
|                        | MEA-3  | 2:0.3:0.4:0.5:50:0 (0)                                                                                                                      | SAPO-43, DNL-6, AIPO-21   |
|                        | MPA-1  | 1.5:0.4:0.4:0.5:50:0.2 (0)                                                                                                                  | DNL-6                     |
| N-Methylpropylamine    | MPA-2  | 1.5:0.4:0.4:0.5:50:0 (20%)                                                                                                                  | DNL-6                     |
|                        | MPA-3  | 1.5:0.4:0.4:0.5:50:0 (0)                                                                                                                    | SAPO-34                   |
|                        | MBA-1  | 2:0.3:0.4:0.5:50:0.2 (10%)                                                                                                                  | DNL-6                     |
| N-Methylbutylamine     | MBA-2  | 2:0.3:0.4:0.5:50:0.2 (2%)                                                                                                                   | DNL-6                     |
|                        | MBA-3  | 2:0.3:0.4:0.5:50:0.2 (0)                                                                                                                    | DNL-6                     |
|                        | MBA-4  | 2:0.3:0.4:0.5:50:0 (10%)                                                                                                                    | DNL-6                     |
|                        | MBA-5  | 2:0.3:0.4:0.5:50:0 (0)                                                                                                                      | SAPO-34                   |
|                        | MPeA-1 | 1.5:0.45:0.4:0.5:50:0.2 (0)                                                                                                                 | DNL-6, amorphous          |
| N-Methylpentylamine    | MPeA-2 | 1.5:0.45:0.4:0.5:50:0 (20%)                                                                                                                 | DNL-6                     |
|                        | MPeA-3 | 1.5:0.45:0.4:0.5:50:0 (0)                                                                                                                   | SAPO-34, DNL-6            |
|                        | EPA-1  | 2:0.6:0.4:0.5:50:0.2 (0)                                                                                                                    | DNL-6, amorphous          |
| N-Ethylpropylamine     | EPA-2  | 2:0.6:0.4:0.5:50:0 (40%)                                                                                                                    | DNL-6                     |
|                        | EPA-3  | 2:0.6:0.4:0.5:50:0 (0)                                                                                                                      | SAPO-34, amorphous        |
|                        | EBA-1  | 1:0.55:0.4:0.5:50:0.2 (0)                                                                                                                   | DNL-6, amorphous          |
| N-Ethylbutylamine      | EBA-2  | 1:0.55:0.4:0.5:50:0 (20%)                                                                                                                   | DNL-6, amorphous          |
|                        | EBA-3  | 1:0.55:0.4:0.5:50:0 (0)                                                                                                                     | amorphous                 |
|                        | EIPA-1 | 2:0.45:0.4:0.5:50:0.2 (0)                                                                                                                   | DNL-6, SAPO-34            |
| N-Ethylisopropylamine  | EIPA-2 | 2:0.45:0.4:0.5:50:0 (40%)                                                                                                                   | SAPO-34, DNL-6            |
|                        | EIPA-3 | 2:0.45:0.4:0.5:50:0 (0)                                                                                                                     | SAPO-34                   |
|                        | MIBA-1 | 2.2:0.3:0.4:0.5:50:0.2 (0)                                                                                                                  | DNL-6, SAPO-34            |
| N-Methylisobutylamine  | MIBA-2 | 2.2:0.3:0.4:0.5:50:0 (40%)                                                                                                                  | DNL-6, (SAPO-42, SAPO-34) |
|                        | MIBA-3 | 2.2:0.3:0.4:0.5:50:0 (0)                                                                                                                    | SAPO-34                   |
|                        | ECyA-1 | 2:0.55:0.4:0.5:50:0.2 (0)                                                                                                                   | DNL-6, (SAPO-34, SAPO-42) |
| N-Ethylcyclohexylamine | ECyA-2 | 2:0.55:0.4:0.5:50:0 (40%)                                                                                                                   | DNL-6, SAPO-34            |
|                        | ECyA-3 | 2:0.55:0.4:0.5:50:0 (0)                                                                                                                     | SAPO-34                   |

Notes: \*: The product appearing first is the major phase, while the product obtained in a trace amount is given in parentheses.

#: The amount of seeds is based on the weight of Al<sub>2</sub>O<sub>3</sub> in the gel throughout this article.

**Table S4.** Synthesis conditions of five amines (MIPA, TBEA, EBnA, BA, and PeA) utilized as OSDAs for DNL-6.

| OSDA                   | Sample     | Gel composition                                                                                                         |                         |
|------------------------|------------|-------------------------------------------------------------------------------------------------------------------------|-------------------------|
|                        |            | OSDA: SiO <sub>2</sub> : P <sub>2</sub> O <sub>5</sub> : Al <sub>2</sub> O <sub>3</sub> : H <sub>2</sub> O: CTAB (seed) | Results                 |
| N-Methylisopropylamine | DNL-6-MIPA | 1.0:0.2:0.4:0.5:50:0.15 (5% seed A)                                                                                     | DNL-6, SAPO-34, SAPO-42 |
| N-tert-Butylethylamine | DNL-6-TBEA | 1.2:0.2:0.4:0.5:50:0.15 (5% seed A)                                                                                     | SAPO-42, DNL-6, SAPO-34 |
| N-Ethylbenzylamine     | DNL-6-EBnA | 2.0:0.8:0.4:0.5:50:0.2 (40% seed B)                                                                                     | DNL-6, amorphous        |
| N-Butylamine           | DNL-6-BA   | 1.1:0.5:0.4:0.5:50:0.2 (40% seed B)                                                                                     | DNL-6, SAPO-34          |
| N-Pentylamine          | DNL-6-PeA  | 1.0:0.5:0.4:0.5:50:0.2 (40% seed B)                                                                                     | DNL-6, SAPO-42          |

**Table S5.** Complementary synthetic information of five recipes of DNL-6s described in Table S4

| Sample     | Raw materials               |                              | Crystallization time (h) |
|------------|-----------------------------|------------------------------|--------------------------|
|            | Silicon source <sup>a</sup> | Aluminum source <sup>b</sup> |                          |
| DNL-6-MIPA | TEOS                        | AiP                          | 24h                      |
| DNL-6-TBEA | TEOS                        | AiP                          | 24h                      |
| DNL-6-EBnA | FS                          | PB                           | 24h                      |
| DNL-6-BA   | TEOS                        | AiP                          | 24h                      |
| DNL-6-PeA  | TEOS                        | AiP                          | 22h                      |

Notes: a: FS, fumed silica; TEOS, tetraethylorthosilicate.

b: PB, pseudo-boehmite; AiP, aluminum isopropoxide.

**Table S6.** Synthesis conditions for SAPO-42.

| OSDA                | Sample        | Gel composition                                                                                                         |  | Results            |
|---------------------|---------------|-------------------------------------------------------------------------------------------------------------------------|--|--------------------|
|                     |               | OSDA: SiO <sub>2</sub> : P <sub>2</sub> O <sub>5</sub> : Al <sub>2</sub> O <sub>3</sub> : H <sub>2</sub> O: CTAB (seed) |  |                    |
| dipropylamine (DPA) | SAPO-42-DPA-1 | 1.7:0.35:0.4:0.5:50:0.15 (no seed)                                                                                      |  | SAPO-42, amorphous |
| dipropylamine (DPA) | SAPO-42-DPA   | 2:0.35:0.4:0.5:50:0.15 (10% seed C)                                                                                     |  | SAPO-42            |
| diethylamine (DEA)  | SAPO-42-DEA   | 2.0:0.3:0.4:0.5:50:0.2 (40% seed C)                                                                                     |  | SAPO-34, SAPO-42   |
| dibutylamine (DBA)  | SAPO-42-DBA   | 2.0:0.3:0.4:0.5:50:0.15 (40% seed C)                                                                                    |  | SAPO-42, amorphous |

**Table S7.** Complementary synthetic information of SAPO-42 in Table S6

| Sample        | Raw materials               |                              | Crystallization time (h) |
|---------------|-----------------------------|------------------------------|--------------------------|
|               | Silicon source <sup>a</sup> | Aluminum source <sup>b</sup> |                          |
| SAPO-42-DPA-1 | TEOS                        | AiP                          | 24h                      |
| SAPO-42-DPA   | TEOS                        | AiP                          | 24h                      |
| SAPO-42-DEA   | TEOS                        | PB                           | 47h                      |
| SAPO-42-DBA   | TEOS                        | AiP                          | 48h                      |

Notes: a: TEOS, tetraethylorthosilicate.

b: PB, pseudo-boehmite; AiP, aluminum isopropoxide.

**Table S8.** Crystallographic details of Rietveld refinements of SAPO-42-DPA

| Sample             | SAPO-42-DPA  |
|--------------------|--------------|
| Space group        | <i>Fm-3c</i> |
| a(Å)               | 24.14794(16) |
| R <sub>p</sub>     | 0.0263       |
| R <sub>wp</sub>    | 0.0425       |
| R <sub>exp</sub>   | 0.0157       |
| R <sub>bragg</sub> | 0.0443       |
| GOF                | 2.6863       |
| Reflections        | 504          |
| Parameters         | 61           |
| Restraints         | 9            |
| CCDC number        | 1856120      |

## Reference

1. Su, X. *et al.* Synthesis and characterization of DNL-6, a new silicoaluminophosphate molecular sieve with the RHO framework. *Microporous Mesoporous Mater.* **144**, 113–119 (2011).
2. Yang, M. *et al.* Cationic surfactant-assisted hydrothermal synthesis: an effective way to tune the crystalline phase and morphology of SAPO molecular sieves. *CrystEngComm* **17**, 8555–8561 (2015).
3. Smeets, S. *et al.* Locating Organic Guests in Inorganic Host Materials from X-ray Powder Diffraction Data. *J. Am. Chem. Soc.* **138**, 7099–7106 (2016).
